# Supplementary material for: Genomics of Staphylococcus aureus Strains Isolated from Infectious and Non-Infectious Ocular Conditions
Source: MDPI journal article supplement (doi:10.3390/antibiotics11081011), 2022-07-27
Supplement: s1 [file s1]

**Supplementary Table S1. Genomic features of *S. aureus* non-ocular isolates**

| <i>S. aureus</i> isolates | Accession number | Source           | MLST  | GC%  | Contigs | Core genes | Shell genes | Pan/total genes |
|---------------------------|------------------|------------------|-------|------|---------|------------|-------------|-----------------|
| <b>M121</b>               | GCA_001021875.1  | Nasal            | ST8   | 32.9 | 1       | 2494       | 388         | 2882            |
| <b>USA300_SUR17</b>       | GCA_002000725.1  | Nasal            | ST8   | 32.8 | 1       | 2518       | 360         | 2878            |
| <b>Mu50</b>               | GCA_000009665.1  | Skin/Soft Tissue | ST5   | 32.9 | 1       | 2324       | 684         | 3008            |
| <b>JKd6159</b>            | GCA_000144955.1  | Skin/Soft Tissue | ST93  | 32.8 | 1       | 2190       | 875         | 3065            |
| <b>2148.N</b>             | GCA_001717665.2  | Nasal            | ST72  | 32.8 | 1       | 2288       | 585         | 2873            |
| <b>CA12</b>               | GCA_001045795.2  | Blood            | ST8   | 32.7 | 1       | 2482       | 321         | 2803            |
| <b>FDAARGOS_159</b>       | GCA_001558795.2  | Skin/Soft Tissue | ST8   | 32.9 | 1       | 2330       | 591         | 2921            |
| <b>JH9</b>                | GCA_000016805.1  | Blood            | ST105 | 32.9 | 1       | 2190       | 875         | 3065            |
| <b>USA_ISMMs1</b>         | GCA_000568455.1  | Heart            | ST8   | 32.8 | 1       | 2512       | 360         | 2872            |
| <b>USA300_FPR3757</b>     | GCA_000013465.1  | Joint            | ST8   | 32.8 | 1       | 2479       | 356         | 2835            |
